# Supplementary material for: A Propensity Score Matched Analysis of Superparamagnetic Iron Oxide versus Radioisotope Sentinel Node Biopsy in Breast Cancer Patients after Neoadjuvant Chemotherapy
Source: MDPI journal article supplement (doi:10.3390/cancers14030676), 2022-01-28
Supplement: s1 [file s1]

## Supplementary Materials

# A Propensity Score Matched Analysis of Superparamagnetic Iron Oxide versus Radioisotope Sentinel Node Biopsy in Breast Cancer Patients after Neoadjuvant Chemotherapy

Zuzanna Pelc <sup>1,\*</sup>, Magdalena Skórzewska <sup>1</sup>, Maria Kurylcio <sup>1</sup>, Tomasz Nowikiewicz <sup>2</sup>, Radosław Mlak <sup>3</sup>, Katarzyna Sędłak <sup>1</sup>, Katarzyna Gęca <sup>1</sup>, Karol Rawicz-Pruszyński <sup>1</sup>, Wojciech Zegarski <sup>2</sup>, Wojciech P. Polkowski <sup>1</sup> and Andrzej Kurylcio <sup>1</sup>

<sup>1</sup> Department of Surgical Oncology, Medical University of Lublin, Radziwiłłowska 13 St., 20-080 Lublin, Poland; magdalena.skorzewska@umlub.pl (M.S.); m.kurylcio@gmail.com (M.K.); sedlak.katarz@gmail.com (K.S.); kasiaa.geca@gmail.com (K.G.); karolrawiczpruszynski@uml.edu.pl (K.R.-P.); wojciechpolkowski@umlub.pl (W.P.P.); andrzej.kurylcio@umlub.pl (A.K.)

<sup>2</sup> Department of Clinical Breast Cancer and Reconstructive Surgery, Oncology Center, Prof. Lukaszczuk Memorial Hospital, Romanowskiej 2 St., 85-796 Bydgoszcz, Poland; tomasz.nowikiewicz@cm.umk.pl (T.N.); zegarskiw@cm.umk.pl (W.Z.)

<sup>3</sup> Department of Human Physiology, Medical University of Lublin, Radziwiłłowska 11 St., 20-080 Lublin, Poland; radoslaw.mlak@gmail.com

\* Correspondence: zuzanna.torun@gmail.com; Tel.: +48-81-53-18-126

**Table S1.** Influence of selected demographic and clinical variables on the efficacy of LNs evaluation in the RI and SPIO groups.

| Variable                           | RI (n = 62)              |                     | $p^a$<br>Iub OR [95%CI]<br>$p^b$ | SPIO (n = 62)            |                     | $p^a$<br>Iub OR [95%CI]<br>$p^b$ |
|------------------------------------|--------------------------|---------------------|----------------------------------|--------------------------|---------------------|----------------------------------|
|                                    | SLNs Evaluation Efficacy |                     |                                  | SLNs Evaluation Efficacy |                     |                                  |
|                                    | <3 evaluated LNs         | >=3 evaluated LNs   |                                  | <3 evaluated LNs         | >=3 evaluated LNs   |                                  |
| Age (Iyears)                       |                          |                     |                                  |                          |                     |                                  |
| Median [interquartile range]       | 55.5 [49–62]             | 47.5 [43–60]        | 0.0618                           | 52 [43–59]               | 55 [43.5–62.5]      | 0.6674                           |
| Weight (kg)                        |                          |                     |                                  |                          |                     |                                  |
| Median [interquartile range]       | 71 [60–78]               | 69 [62–73]          | 0.5349                           | 69 [56–85]               | 67 [60.5–77]        | 0.7680                           |
| BMI                                |                          |                     |                                  |                          |                     |                                  |
| Median [interquartile range]       | 25.94 [23.19–28.76]      | 25.53 [23.46–29.69] | 0.7781                           | 25.90 [21.60–30.12]      | 25.97 [21.91–28.30] | 0.9798                           |
| BMI                                | 13 (48.1%)               | 14 (51.9%)          | 0.98 [0.36–2.68] 0.9736          | 6 (25%)                  | 18 (75%)            | 1.25 [0.37–4.19]                 |
| Underweight or Healthy body weight |                          |                     |                                  |                          |                     |                                  |
| Overweight or Obese (classes 1–3)  | 17 (48.6%)               | 18 (51.4%)          |                                  | 8 (21.1%)                | 30 (78.9%)          | 0.7176                           |

|                                     |            |            |                  |            |            |                   |
|-------------------------------------|------------|------------|------------------|------------|------------|-------------------|
| <b>Tumor highest diameter (mm)</b>  | 16 [13–31] | 22 [13–30] | 0.7969           | 25 [19–34] | 22 [13–30] | 0.3580            |
| <b>ypT</b>                          |            |            |                  |            |            |                   |
| 0                                   | 17 (47.2%) | 19 (52.8%) | 0.89 [0.33–2.45] | 8 (22.9%)  | 27 (77.1%) | 1.04 [0.31–3.45]  |
| 1 or 2                              | 13 (50%)   | 13 (50%)   | 0.8290           | 6 (22.2%)  | 21 (77.8%) | 0.9527            |
| <b>ypN</b>                          |            |            |                  |            |            |                   |
| Negative                            | 27 (47.4%) | 30 (52.6%) | 0.60 [0.09–3.87] | 13 (22.8%) | 44 (77.2%) | 1.18 [0.12–11.52] |
| Positive                            | 3 (60%)    | 2 (40%)    | 0.5910           | 1 (20%)    | 4 (80%)    | 0.8857            |
| <b>Biological subtype of cancer</b> |            |            |                  |            |            |                   |
| A, B1, B2, HER2+                    | 21 (47.7%) | 23 (52.3%) | 0.91 [0.30–2.73] | 11 (25%)   | 33 (75%)   | 1.67 [0.40–6.86]  |
| TN                                  | 9 (50%)    | 9 (50%)    | 0.8709           | 3 (16.7%)  | 15 (83.3%) | 0.4792            |
| <b>Biological subtype of cancer</b> |            |            |                  |            |            |                   |
| A, B1, B2, TN                       | 27 (49.1%) | 28 (50.9%) | 1.29 [0.26–6.29] | 13 (23.6%) | 42 (76.4%) | 1.86 [0.20–16.87] |
| HER2+                               | 3 (42.9%)  | 4 (57.1%)  | 0.7564           | 1 (14.3%)  | 6 (85.7%)  | 0.5824            |
| <b>Response to NAC*</b>             |            |            |                  |            |            |                   |
| No response                         | 9 (47.4%)  | 10 (52.6%) | 0.94 [0.32–2.78] | 6 (23.1%)  | 20 (76.9%) | 1.05 [0.31–3.50]  |
| Response                            | 21 (48.8%) | 22 (51.2%) | 0.9150           | 8 (22.2%)  | 28 (77.8%) | 0.9367            |

RI—radioisotope, SPIO—superparamagnetic iron oxide, OR—odds ratio, pa—chi-square test result, pb—odds ratio test result, SLNs—sentinel lymph nodes, BMI—body mass index, ypT—post neoadjuvant therapy pathological tumor categorization, ypN—post neoadjuvant therapy pathological nodal categorization, A—luminal A, B1—luminal B human epithelial receptor-negative, B2—luminal B human epithelial receptor-positive, HER2+—human epithelial receptor-positive, TN—triple-negative, \*—statistically significant result, ^—a trend into statistically significant result.
